# Supplementary material for: A new microporous carbon material synthesized via thermolysis of a porous aromatic framework embedded with an extra carbon source for low-pressure CO2 uptake
Source: Royal Society of Chemistry journal article supplement (doi:10.1039/c3cc45252b), 2013-01-01
Supplement: c3cc45252b.pdf [file c3cc45252b.pdf]

## Electronic Supplementary Information

### **A New Microporous Carbon Material Synthesized via Thermolysis of Porous Aromatic Framework Embedded with Extra Carbon Source for Low-Pressure CO<sub>2</sub> Uptake**

Yiming Zhang,<sup>‡</sup> Baiyan Li,<sup>‡</sup> Kia Williams, Wen-Yang Gao, and Shengqian Ma\*

Department of Chemistry, University of South Florida, 4202 East Fowler Avenue,  
Tampa, Florida, 33620, United States, Fax: +1 813-974-3203; Tel: +1 813-974-5217;  
E-mail: sqma@usf.edu

<sup>‡</sup>These authors contributed equally to this work.

## Experimental Details

All reagents were purchased from Sigma-Aldrich or Alfa and used as received unless otherwise indicated. PAF-1<sup>1</sup> and PAF-1-SO<sub>3</sub>H<sup>2</sup> were synthesized according to procedures reported in the literatures.

### **Synthesis of PAF-1-SO<sub>3</sub>H**

To an ice-cooled mixture of PAF-1 (100 mg) in dichloromethane (15 mL), chlorosulfonic acid (1.0 mL) was added drop wise. The resulting mixture was stirred at room temperature for three days. Then, the mixture was poured into ice, and the solid was collected, washed with water substantially, and dried to produce PAF-1-SO<sub>3</sub>H as blue powder.

### **Synthesis of PAF-1/C-900**

Prior to carbon precursor loading, PAF-1-SO<sub>3</sub>H was evacuated at 120 °C for 10 h. Liquid FA was then introduced into the pretreated PAF-1-SO<sub>3</sub>H at room temperature, and it was observed that the polymerization FA almost finished within 5 min. The mixture then remained stirred in an evacuated environment for 2 days to maximize the introduction and polymerization of FA within the interior pores of PAF-1-SO<sub>3</sub>H. After filtration and washing with ethanol to remove FA adsorbed on the exterior surface, the composite powder was heated in a horizontal quartz reactor under an N<sub>2</sub> flowing atmosphere, at 80 °C for 24 h and then at 150 °C for 6 h, and was finally carbonized at 900 °C for 8 h to afford the carbon material designated as PAF-1/C-900.

### **Synthesis of PAF-1-900 and Poly(FA)-900**

For comparison studies, PAF-1-900 and Poly(FA)-900 samples were also prepared using the same aforementioned thermolysis procedures.

### **Characterizations**

PXRD data were collected on a Bruker D8 Advance X-ray diffractometer. Gas sorption experiments were carried out on the surface area analyzer ASAP-2020. N<sub>2</sub> gas sorption isotherms were collected at 77 K using a liquid N<sub>2</sub> bath. CO<sub>2</sub> sorption isotherms were measured at 273 K using a water-ice bath and at 295 K with a water bath. Prior to the measurements, the samples were degassed for 10 h at 200 °C.

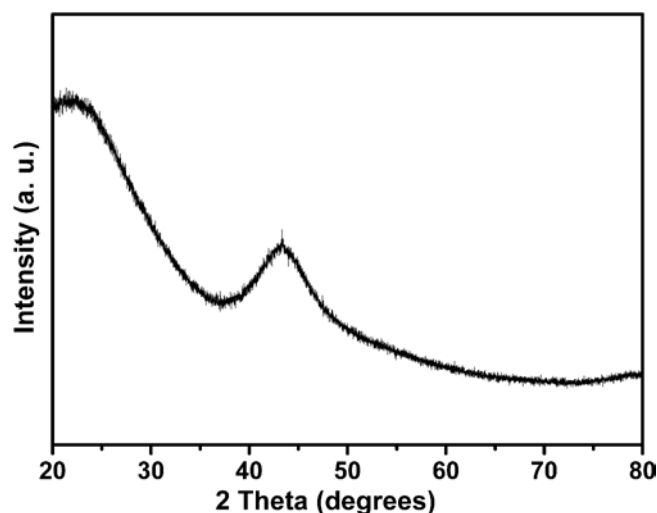

Fig. S1. PXRD patterns of PAF-1/C-900.

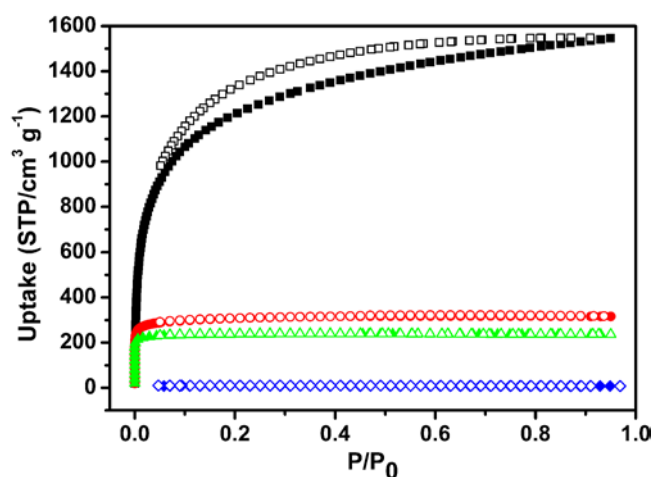

Fig. S2. N<sub>2</sub> sorption isotherms for PAF-1 and carbonized samples. (adsorption: filled; desorption: open; PAF-1: black squares; PAF-1/C-900: red circles; PAF-1-900: green triangles; Poly(FA)-900: blue diamonds).

Table S1 Texture properties of PAF-1 and carbonized samples

| Sample       | $S_{\text{BET}}^{\text{a}}$ ( $\text{m}^2 \text{g}^{-1}$ ) | Pore size <sup>b</sup> (Å) |
|--------------|------------------------------------------------------------|----------------------------|
| PAF-1        | 4246                                                       | 14.5                       |
| PAF-1/C-900  | 1174                                                       | 5.4                        |
| PAF-1-900    | 923                                                        | 9.4                        |
| Poly(FA)-900 | 28                                                         | 21.6                       |

<sup>a</sup>  $S_{\text{BET}}$  was calculated in the partial pressure ( $P/P_0$ ) range of 0.01 to 0.1 which gives the best linear fitting.

<sup>b</sup> Maxima of the pore size distribution calculated using the Horvath-Kawazoe (HK) model.

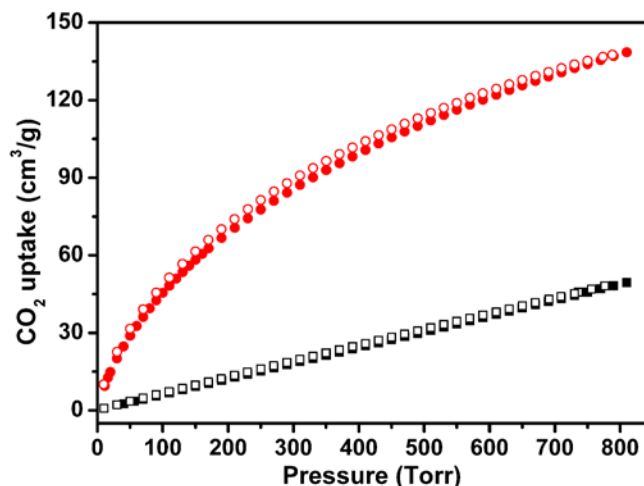

**Fig. S3.** CO<sub>2</sub> adsorption isotherms of PAF-1/C-900 and PAF-1 at 273K. (adsorption: filled; desorption: open; PAF-1/C-900: red circles; PAF-1: black squares).

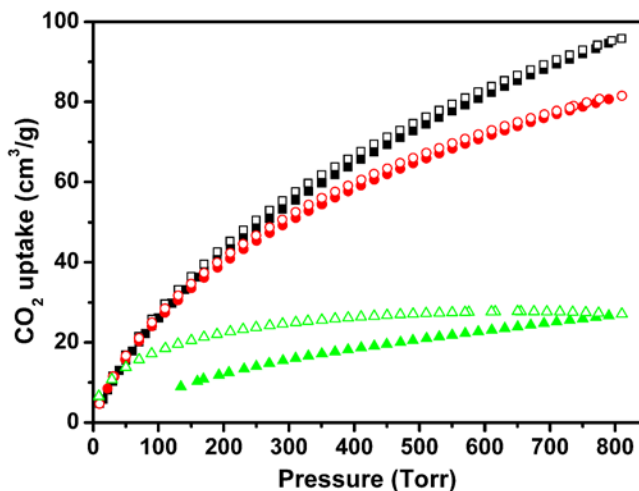

**Fig. S4.** CO<sub>2</sub> adsorption isotherms of PAF-1/C-900, PAF-1-900 and Poly(FA)-900 at 295K. (adsorption: filled; desorption: open; PAF-1/C-900: black squares; PAF-1-900: red circles; Poly(FA)-900: green triangles).

### **Heats of Adsorption ( $Q_{st}$ ) Calculation.**

The virial equation of the form given in Equation (1) was employed to calculate the enthalpies of adsorption for CO<sub>2</sub> on PAF-1 and PAF-1/C-900.

$$\ln P = \ln N + 1/T \sum_{i=0}^m a_i N^i + \sum_{i=0}^n b_i N^i \quad (1)$$

where  $P$  is the pressure expressed in Torr,  $N$  is the amount adsorbed in mmol/g,  $T$  is the temperature in K,  $a_i$  and  $b_i$  are virial coefficients, and  $m$  and  $n$  represent the number of coefficients required to adequately describe the isotherms. The equation was fitted by using the least-squares method;  $m$  and  $n$  were gradually increased until the contribution of  $a$  and  $b$

coefficients toward the overall fitting is statistically trivial, as determined by the t-test. The values of the virial coefficients  $a_0 \dots a_m$  were then used to calculate the isosteric heat of adsorption by the following expression:

$$Q_{st} = -R \sum_{i=0}^m a_i N^i \quad (2)$$

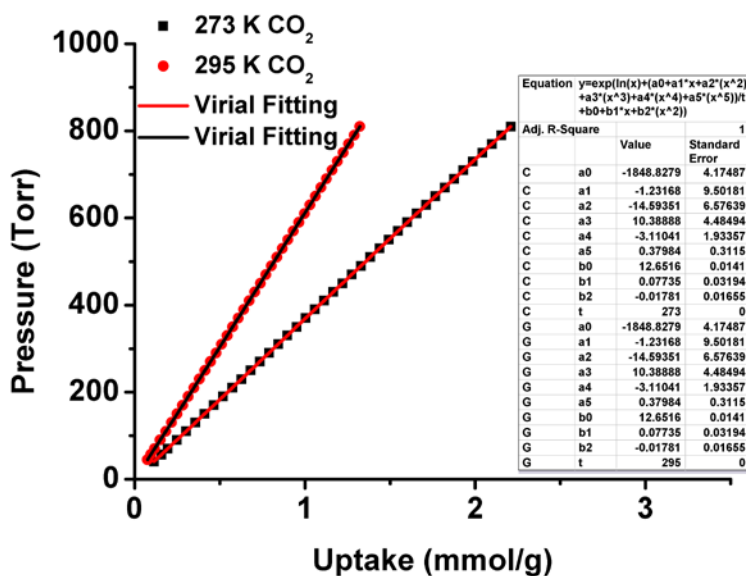

Fig. S5 The plots of virial equation of PAF-1.

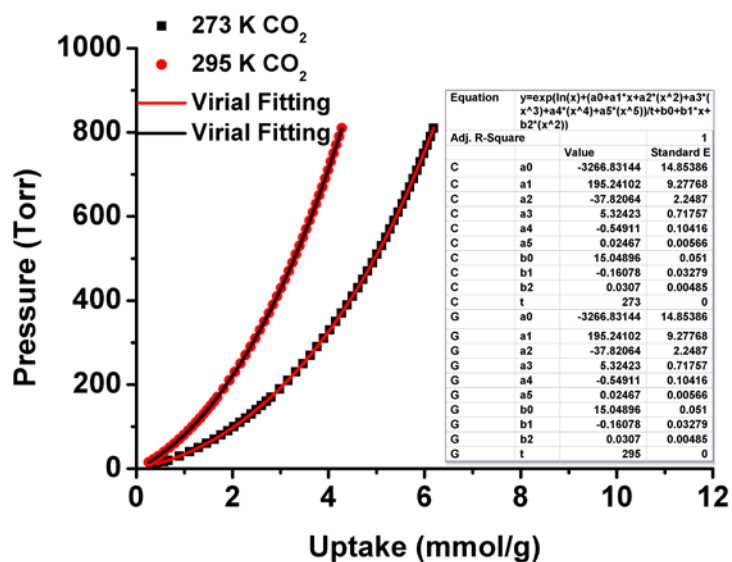

Fig. S6 The plots of virial equation of PAF-1/C-900.

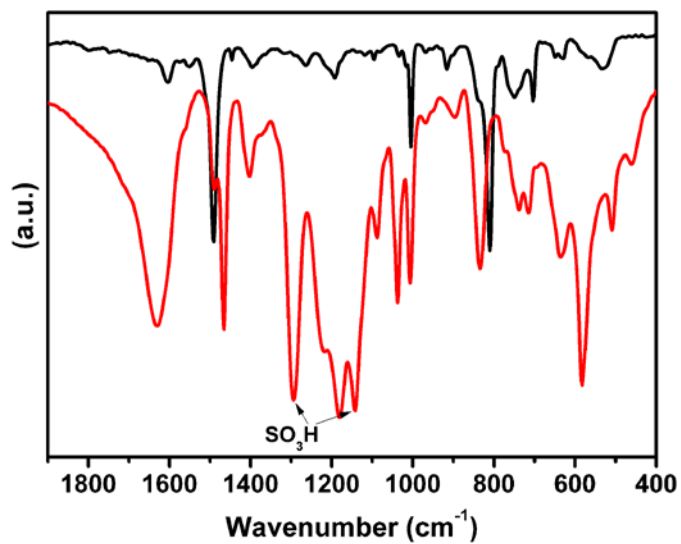

**Fig. S7** FT-IR spectra of PAF-1 (black) and PAF-1-SO<sub>3</sub>H (red).

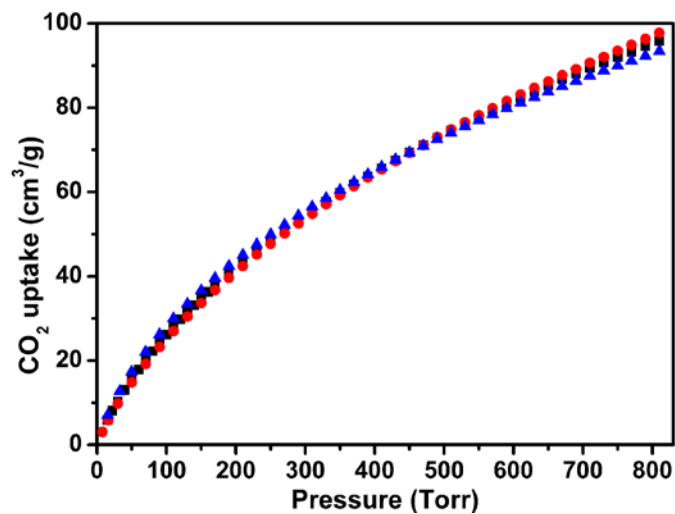

**Fig. S8** CO<sub>2</sub> adsorption isotherms at 295 K for PAF-1/C-900 prepared from three different batches.

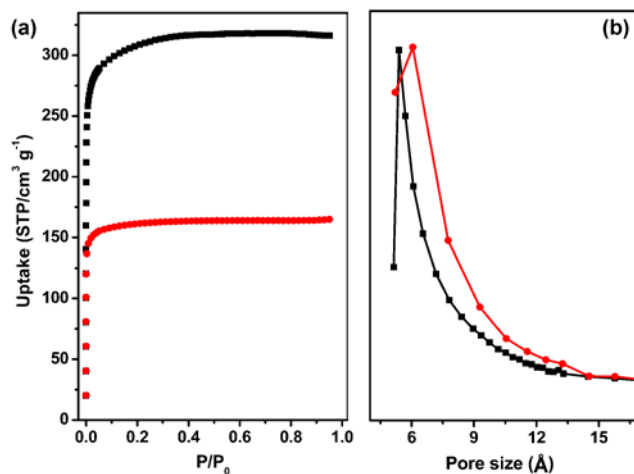

**Fig. S9** (a) N<sub>2</sub> adsorption isotherms at 77 K and (b) pore size distributions for PAF-1/C-900 obtained by PAF-1-SO<sub>3</sub>H with different SO<sub>3</sub>H amounts (black, S/C: 0.053; red, S/C: 0.027).

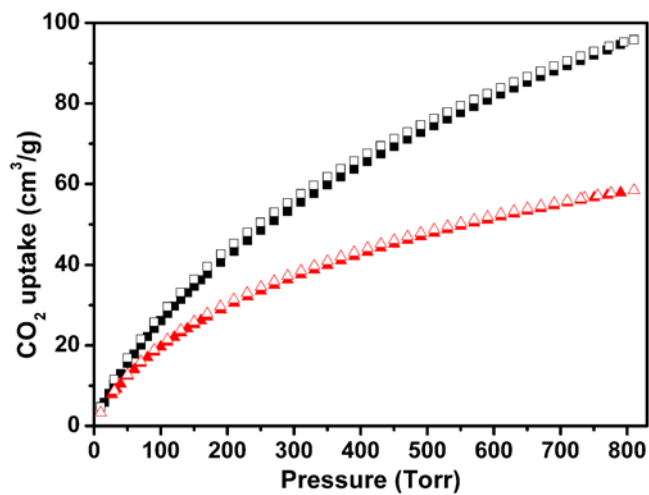

**Fig. S10** The CO<sub>2</sub> adsorption isotherms of PAF-1/C-900 obtained by PAF-1-SO<sub>3</sub>H with different SO<sub>3</sub>H amounts (S/C ratio: black, 0.053; red, 0.027).

## Reference

- 1 T. Ben, H. Ren, S. Ma, D. Cao, J. Lan, X. Jing, W. Wang, J. Xu, F. Deng, J. M. Simmons, S. Qiu, and G. Zhu, *Angew. Chem. Int. Ed.*, 2009, **48**, 9457.
- 2 W. Lu, D. Yuan, J. Sculley, D. Zhao, R. Krishna, and H.-C. Zhou, *J. Am. Chem. Soc.*, 2011, **133**, 18126.
